# Supplementary material
Source: PubMed Central journal article supplement (PMC4651726)

## **Supplementary Tables and Figure Headings**

### **Supplementary Table S1.**

**219 SNPs identified in the *RTN1* region (AA T2D-ESKD Discovery)**

### **Supplementary Table S2.**

***RTN1* SNPs associated with T2D-ESKD in AA Discovery Study**

### **Supplementary Table S3.**

**Hardy-Weinberg Equilibrium for variants tested in AA T2D-ESKD studies**

### **Figure Legend:**

### **Supplementary Figure S1.**

**LD block (D') of 219 SNP *RTN1* gene region used in the African American Discovery study**

Supplementary Table S1.

| chr | pos      | snp        |
|-----|----------|------------|-----|----------|------------|-----|----------|------------|-----|----------|------------|
| 14  | 59165466 | rs12432863 | 14  | 59277318 | rs7147135  | 14  | 59361214 | rs1253269  | 14  | 59371220 | rs11622755 |
| 14  | 59179333 | rs12434215 | 14  | 59278941 | rs10138254 | 14  | 59131314 | rs17255975 | 14  | 59369282 | rs10483719 |
| 14  | 59179524 | rs12431381 | 14  | 59163968 | rs11848964 | 14  | 59304027 | rs10145018 | 14  | 59213730 | rs9972162  |
| 14  | 59227489 | rs1952034  | 14  | 59234823 | rs4243617  | 14  | 59245169 | rs2182138  | 14  | 59211702 | rs8003081  |
| 14  | 59270825 | rs8013741  | 14  | 59129149 | rs12879225 | 14  | 59304617 | rs7149764  | 14  | 59161835 | rs2145043  |
| 14  | 59128360 | rs8020346  | 14  | 59278816 | rs11847286 | 14  | 59328794 | rs10145579 | 14  | 59132159 | rs2073319  |
| 14  | 59233626 | rs11626132 | 14  | 59251609 | rs10151510 | 14  | 59307615 | rs7146207  | 14  | 59379238 | rs10137605 |
| 14  | 59267022 | rs2350137  | 14  | 59156145 | rs7148487  | 14  | 59311190 | rs10498490 | 14  | 59170720 | rs4898998  |
| 14  | 59211575 | rs1956373  | 14  | 59214066 | rs1957993  | 14  | 59158368 | rs1950781  | 14  | 59160512 | rs1884736  |
| 14  | 59214486 | rs1952039  | 14  | 59219012 | rs2182140  | 14  | 59121556 | rs7158491  | 14  | 59381762 | rs12434782 |
| 14  | 59216308 | rs1952043  | 14  | 59223308 | rs2094058  | 14  | 59313944 | rs17096618 | 14  | 59316915 | rs6573284  |
| 14  | 59227113 | rs727690   | 14  | 59223521 | rs7159851  | 14  | 59138607 | rs1950789  | 14  | 59236067 | rs9652350  |
| 14  | 59164649 | rs4403980  | 14  | 59215539 | rs17096496 | 14  | 59363723 | rs1271516  | 14  | 59375301 | rs12890222 |
| 14  | 59240800 | rs9323353  | 14  | 59230318 | rs12885453 | 14  | 59305654 | rs7155725  | 14  | 59212253 | rs12883159 |
| 14  | 59334971 | rs1957984  | 14  | 59218606 | rs10151911 | 14  | 59142144 | rs1950785  | 14  | 59129546 | rs4901945  |
| 14  | 59262706 | rs1952041  | 14  | 59218675 | rs10141258 | 14  | 59303369 | rs7144203  | 14  | 59372954 | rs12878097 |
| 14  | 59172155 | rs12896541 | 14  | 59249700 | rs1952036  | 14  | 59143235 | rs726041   | 14  | 59174889 | rs1956368  |
| 14  | 59199731 | rs12885515 | 14  | 59381817 | rs1957309  | 14  | 59157053 | rs7154940  | 14  | 59372202 | rs12433741 |
| 14  | 59329346 | rs1957982  | 14  | 59367818 | rs10141630 | 14  | 59157133 | rs7154819  | 14  | 59373912 | rs1957307  |
| 14  | 59279631 | rs11847592 | 14  | 59248687 | rs10151833 | 14  | 59238696 | rs12891188 | 14  | 59141031 | rs10483717 |
| 14  | 59209753 | rs17731398 | 14  | 59373251 | rs7140989  | 14  | 59375190 | rs12891291 | 14  | 59367890 | rs10141732 |
| 14  | 59217412 | rs10148598 | 14  | 59288096 | rs2147831  | 14  | 59232596 | rs12434368 | 14  | 59317037 | rs8015726  |
| 14  | 59155300 | rs927092   | 14  | 59292730 | rs8018516  | 14  | 59158398 | rs4502122  | 14  | 59205457 | rs10444723 |
| 14  | 59218986 | rs2182139  | 14  | 59315171 | rs9652285  | 14  | 59314766 | rs7140886  | 14  | 59168121 | rs1956369  |
| 14  | 59256251 | rs2350136  | 14  | 59298161 | rs8007076  | 14  | 59160264 | rs1884737  | 14  | 59408099 | rs2882302  |
| 14  | 59256113 | rs9323355  | 14  | 59298601 | rs6573283  | 14  | 59159524 | rs17096463 | 14  | 59219663 | rs1013822  |
| 14  | 59158356 | rs1950782  | 14  | 59313503 | rs17096617 | 14  | 59301619 | rs10135870 | 14  | 59127433 | rs976264   |
| 14  | 59264894 | rs12432408 | 14  | 59313347 | rs17096614 | 14  | 59173570 | rs2103968  | 14  | 59180974 | rs8022717  |
| 14  | 59265906 | rs10136152 | 14  | 59376253 | rs10140074 | 14  | 59238425 | rs12717467 | 14  | 59209592 | rs7160227  |
| 14  | 59269321 | rs1957995  | 14  | 59128284 | rs2180547  | 14  | 59209773 | rs17804446 | 14  | 59201114 | rs10148684 |
| 14  | 59270767 | rs8014898  | 14  | 59254088 | rs8018248  | 14  | 59124838 | rs4901944  | 14  | 59389458 | rs1028606  |
| 14  | 59392440 | rs8012293  | 14  | 59255089 | rs8004529  | 14  | 59329072 | rs11158270 | 14  | 59130326 | rs10139045 |
| 14  | 59335682 | rs8017824  | 14  | 59136249 | rs11623120 | 14  | 59126943 | rs976265   | 14  | 59144481 | rs1950784  |
| 14  | 59265987 | rs1957994  | 14  | 59388649 | rs17096709 | 14  | 59128772 | rs9671234  | 14  | 59333689 | rs1957983  |
| 14  | 59267800 | rs8007780  | 14  | 59303855 | rs10145080 | 14  | 59130078 | rs7158138  | 14  | 59384162 | rs12891329 |
| 14  | 59314200 | rs12893956 | 14  | 59365835 | rs1957302  | 14  | 59345810 | rs11626159 | 14  | 59124017 | rs10136451 |
| 14  | 59254488 | rs9323354  | 14  | 59247881 | rs10151203 | 14  | 59324694 | rs8005335  | 14  | 59338667 | rs12323493 |
| 14  | 59232065 | rs1957990  | 14  | 59381981 | rs17096694 | 14  | 59354819 | rs6573285  | 14  | 59126210 | rs10143325 |
| 14  | 59210182 | rs10148728 | 14  | 59125317 | rs10873117 | 14  | 59353633 | rs8011499  | 14  | 59385513 | rs12897163 |
| 14  | 59281197 | rs10150849 | 14  | 59310078 | rs7152594  | 14  | 59382002 | rs927326   | 14  | 59384251 | rs12891198 |
| 14  | 59279165 | rs7159057  | 14  | 59299450 | rs10135659 | 14  | 59373775 | rs1957305  | 14  | 59124672 | rs4901943  |
| 14  | 59283128 | rs12587247 | 14  | 59249028 | rs10131474 | 14  | 59244262 | rs11624351 | 14  | 59384566 | rs12891599 |
| 14  | 59209738 | rs10137320 | 14  | 59395448 | rs968124   | 14  | 59302323 | rs17731838 | 14  | 59152157 | rs8008377  |
| 14  | 59261942 | rs6573282  | 14  | 59299985 | rs8007978  | 14  | 59301435 | rs10147912 | 14  | 59154465 | rs1811861  |
| 14  | 59212109 | rs989591   | 14  | 59301473 | rs7152305  | 14  | 59127134 | rs7150812  | 14  | 59158479 | rs2073317  |
| 14  | 59156005 | rs8011176  | 14  | 59301729 | rs10138288 | 14  | 59145071 | rs726462   | 14  | 59200619 | rs4901951  |
| 14  | 59125198 | rs4898997  | 14  | 59302147 | rs10138713 | 14  | 59300573 | rs8009507  | 14  | 59211296 | rs1956351  |
| 14  | 59331780 | rs8020176  | 14  | 59191456 | rs2349698  | 14  | 59336860 | rs12435287 | 14  | 59218553 | rs1957998  |
| 14  | 59359485 | rs8004850  | 14  | 59208672 | rs6573280  | 14  | 59340072 | rs17096657 | 14  | 59221209 | rs11626406 |
| 14  | 59394703 | rs17310036 | 14  | 59207362 | rs7147929  | 14  | 59351140 | rs12436827 | 14  | 59233854 | rs1952035  |
| 14  | 59389620 | rs3925441  | 14  | 59191992 | rs7152449  | 14  | 59208982 | rs17096483 | 14  | 59295636 | rs11849955 |
| 14  | 59391576 | rs12432068 | 14  | 59141776 | rs1950786  | 14  | 59157663 | rs10148925 | 14  | 59298681 | rs12586848 |
| 14  | 59387612 | rs10483720 | 14  | 59401519 | rs2064993  | 14  | 59143688 | rs1956372  | 14  | 59336262 | rs12232233 |
| 14  | 59385633 | rs12897336 | 14  | 59333579 | rs10467806 | 14  | 59144017 | rs8009556  | 14  | 59339573 | rs2277506  |
| 14  | 59386666 | rs2064991  | 14  | 59298561 | rs7145014  | 14  | 59130489 | rs17834280 |     |          |            |

Supplementary Table S2

| SNP        | Chr | Position | OR   | P value |
|------------|-----|----------|------|---------|
| rs12432863 | 14  | 59165466 | 1.42 | 0.003   |
| rs12434215 | 14  | 59179333 | 1.41 | 0.0034  |
| rs12431381 | 14  | 59179524 | 0.74 | 0.0047  |
| rs1952034  | 14  | 59227489 | 1.36 | 0.010   |
| rs8013741  | 14  | 59270825 | 0.69 | 0.029   |
| rs8020346  | 14  | 59128360 | 0.77 | 0.036   |
| rs11626132 | 14  | 59233626 | 1.68 | 0.048   |

Data adjusted for admixture and APOL1

Supplementary Table S3.

| Chromosome | Marker     | Location | Prob_HWE |
|------------|------------|----------|----------|
| 14         | rs1952034  | 59227489 | 0.40     |
| 14         | rs12431381 | 59179524 | 0.81     |
| 14         | rs12434215 | 59179333 | 0.88     |

Supplementary Figure S1.

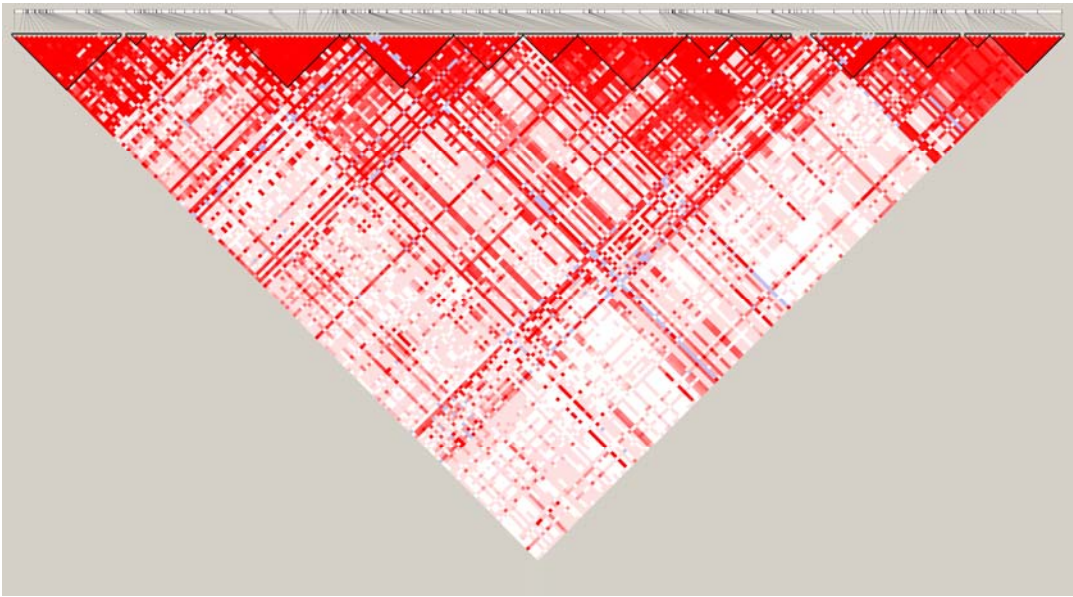

Supplement: NIHMS726190-supplement-01.pdf [file NIHMS726190-supplement-01.pdf]
